# Supplementary material for: Chemical regeneration mechanism of Fe-impregnated chitosan using ferric chloride
Source: Royal Society of Chemistry journal article supplement (doi:10.1039/c5ra11314h), 2015-01-01
Supplement: c5ra11314h1.pdf [file c5ra11314h1.pdf]

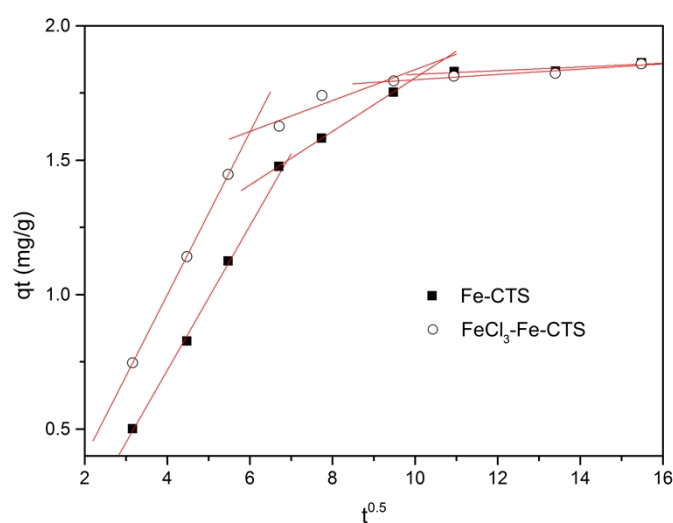

Fig. S1. Intraparticle diffusion model of fluoride adsorption on Fe-CTS and FeCl<sub>3</sub>-Fe-CTS at fluoride initial concentration of 10 mg/L

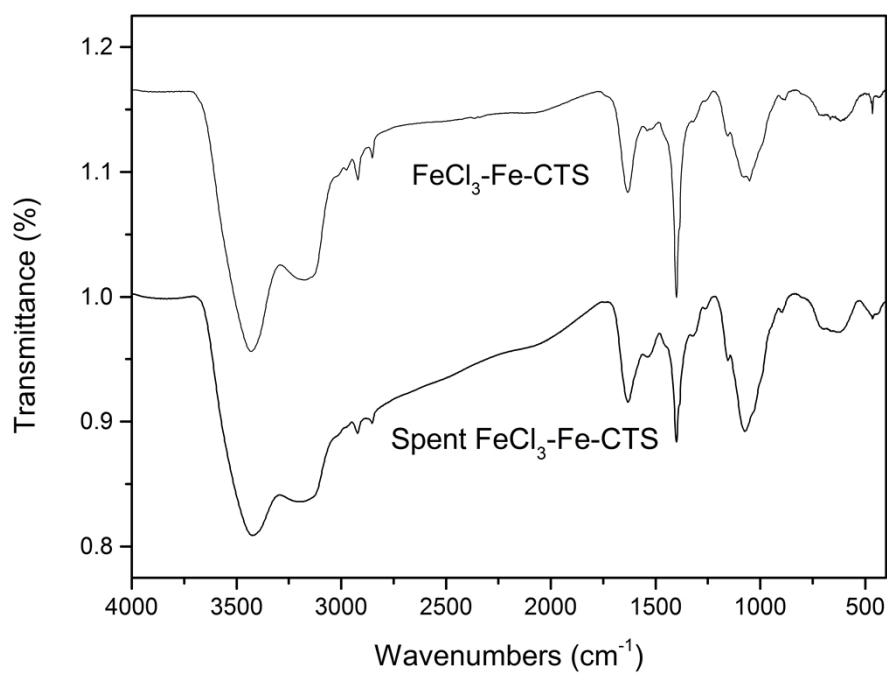

Fig. S2. FTIR spectra of FeCl<sub>3</sub>-Fe-CTS and spent FeCl<sub>3</sub>-Fe-CTS

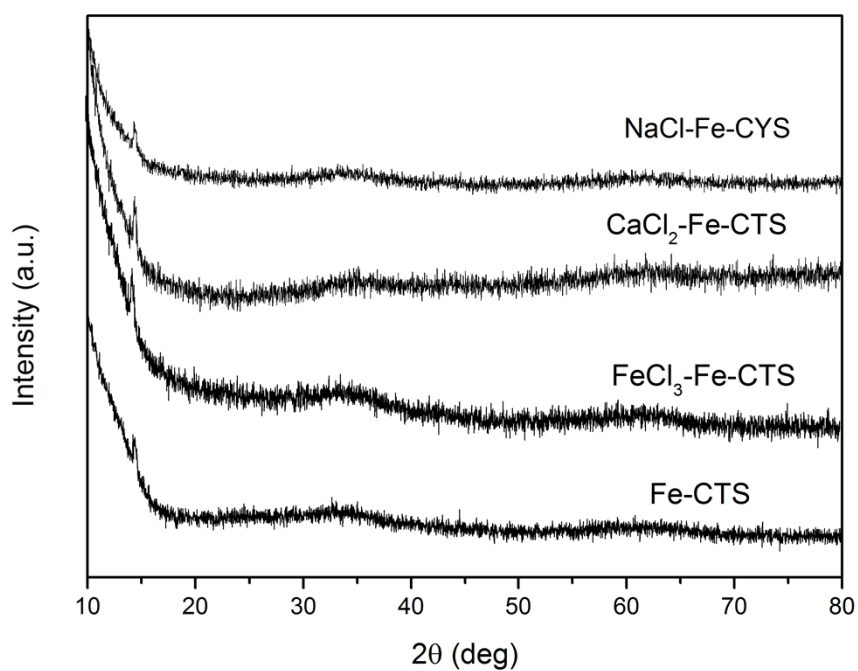

Fig. S3. XRD patterns of Fe-CTS, FeCl<sub>3</sub>-Fe-CTS, CaCl<sub>2</sub>-Fe-CTS, and NaCl-Fe-CTS

Table S1 pH of CaCl<sub>2</sub> and NaCl solution after regeneration

| Concentration of Ca <sup>2+</sup> (mg/L)        | 30    | 60     | 90     | 120    | 150   |
|-------------------------------------------------|-------|--------|--------|--------|-------|
| pH of solution after regeneration               | 4.65  | 4.61   | 4.27   | 4.77   | 4.76  |
| Concentration of Cl <sup>-</sup> in NaCl (mg/L) | 57.05 | 114.11 | 171.16 | 285.27 | 532.5 |
| pH of solution after regeneration               | 4.65  | 4.66   | 4.64   | 4.77   | 4.9   |
